# Supplementary material
Source: Springer Nature journal article supplement (https://www.springermedizin.de/resource/supplementary/13048_2013_236_MOESM3_ESM.pdf/9665192)

## Additional fig.2 Scratch-wound assay

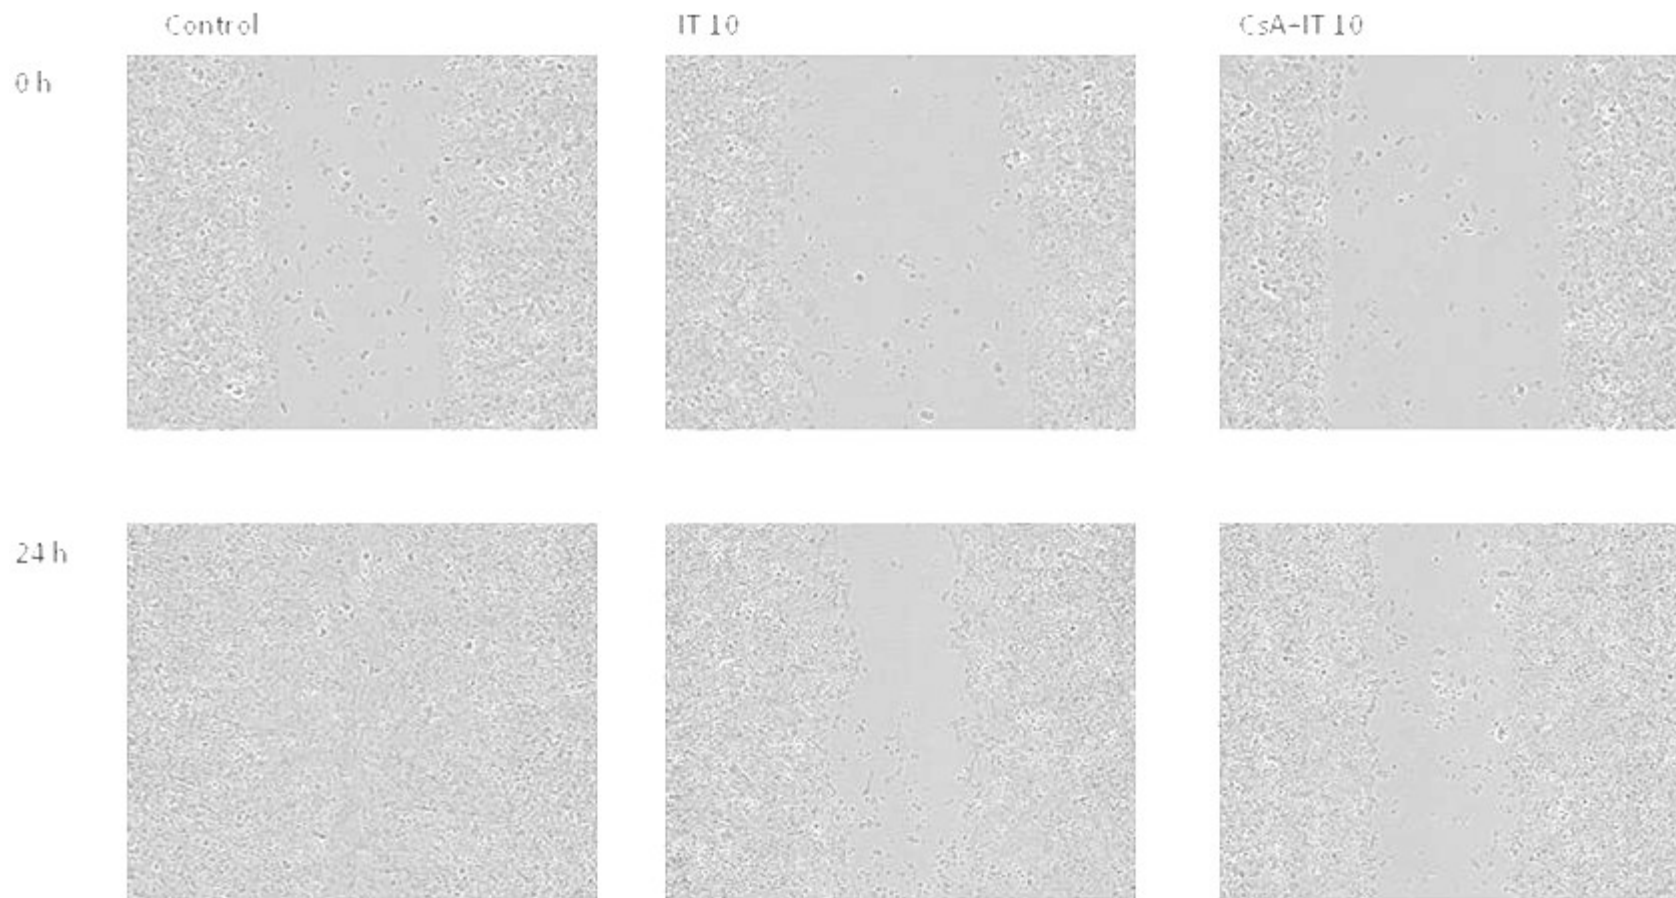

Supplement: MOESM3 [file 9665192]
